# Supplementary material
Source: HighWire-hosted journal article supplement (http://cmaj.ca/highwire/filestream/150212/field_highwire_adjunct_files/0/231460-image-1-at.pdf)

Supplemental Figure. Pathology showed lymphocytic vasculitis associated with fibrinoid necrosis and thrombotic occlusion of individual vessels. (HE stain)

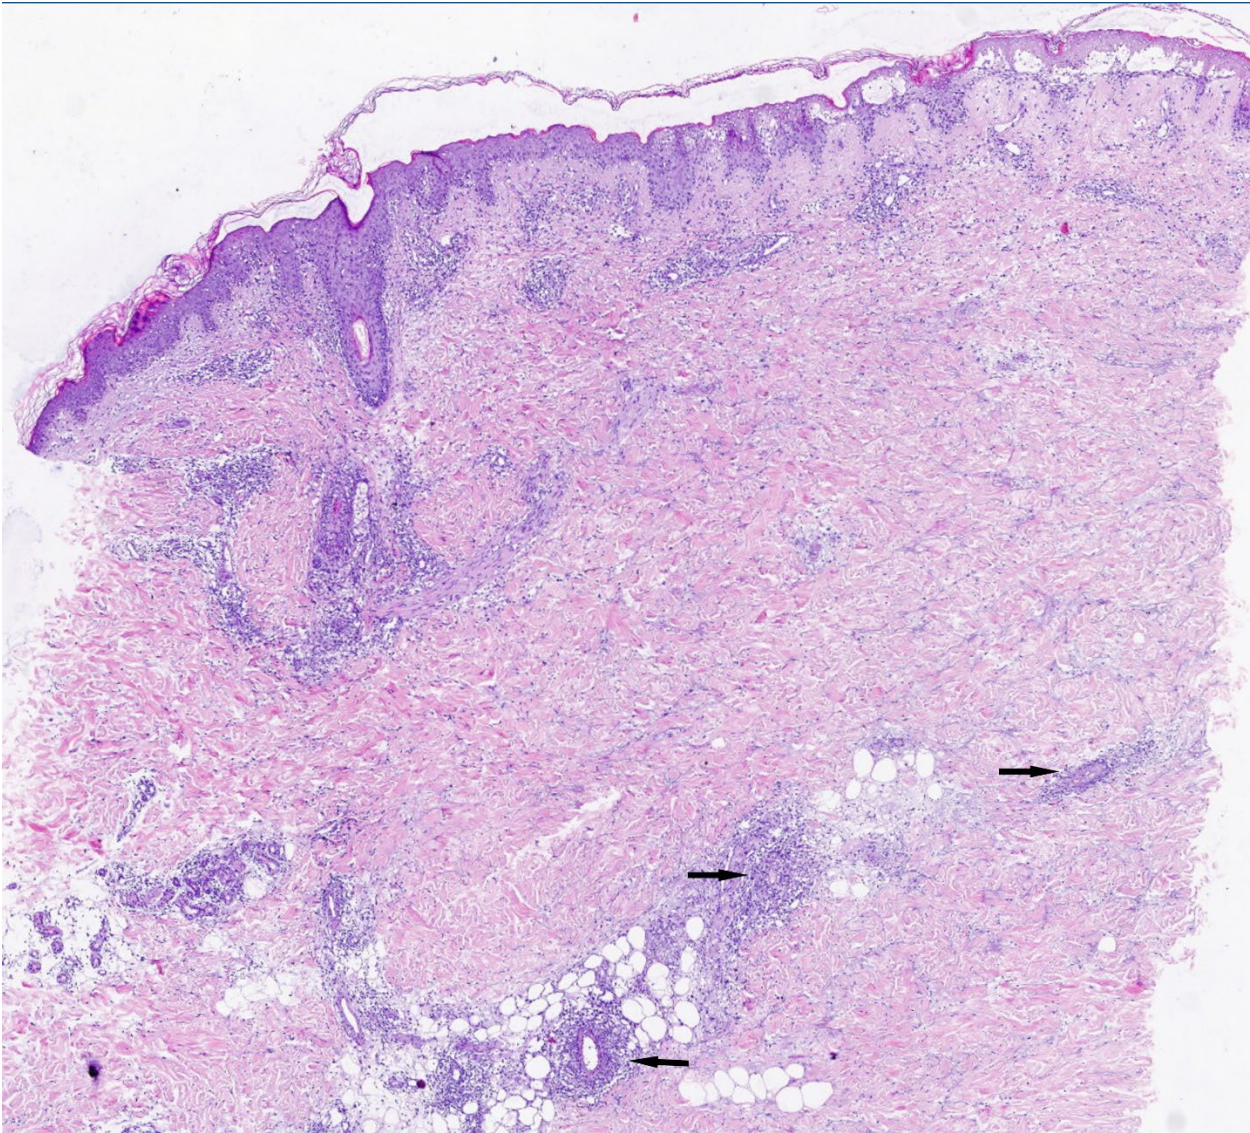

Supplement: 231460-image-1-at.pdf [file 231460-image-1-at.pdf]
